# Supplementary material for: Single-cell RNA sequencing of the mammalian pineal gland identifies two pinealocyte subtypes and cell type-specific daily patterns of gene expression
Source: PubMed Central journal article supplement (PMC6197868; doi:10.1371/journal.pone.0205883), 2018-10-22

**S23 Fig. Relative expression of lipoxygenase and phospholipase transcripts.** Color intensity represents the z-scored average of normalized counts for a given gene across all cells. Dot size represents the fraction of cells within a cell type that express a given gene (see legend at bottom). All day and night samples included (N=13,607). (+) symbol above dot indicates transcript upregulation at night, (-) indicates upregulation during the day ( $p < 0.01$ , Wilcoxon rank sum; effect size  $\geq 0.35$ , fold change  $\geq 2.0$ , expressed in  $\geq 15.0\%$  of cells).

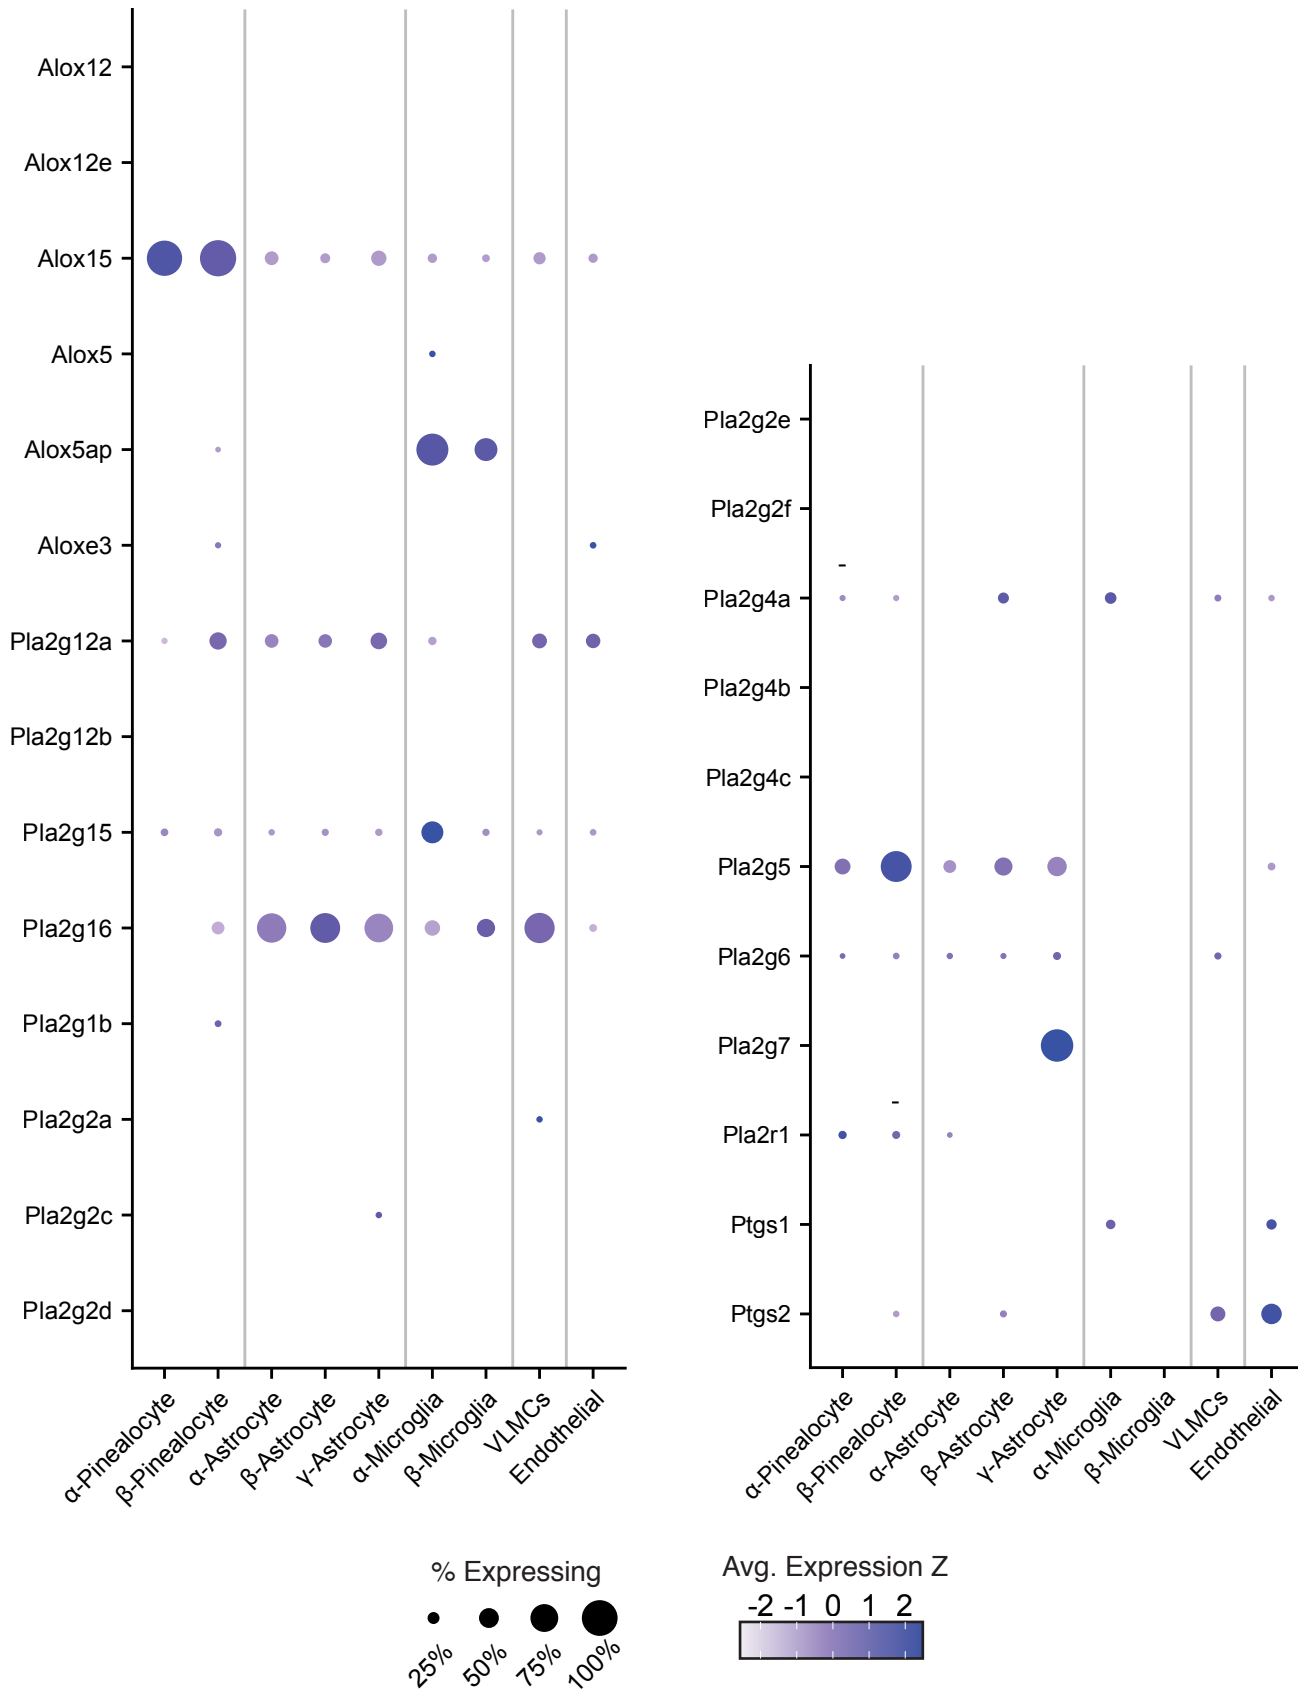

Supplement: pone.0205883.s027.pdf [file pone.0205883.s027.pdf]
