# Supplementary material for: Single-cell RNA sequencing of the mammalian pineal gland identifies two pinealocyte subtypes and cell type-specific daily patterns of gene expression
Source: PubMed Central journal article supplement (PMC6197868; doi:10.1371/journal.pone.0205883), 2018-10-22

**A. Night tSNE Projection (n=7,940)**

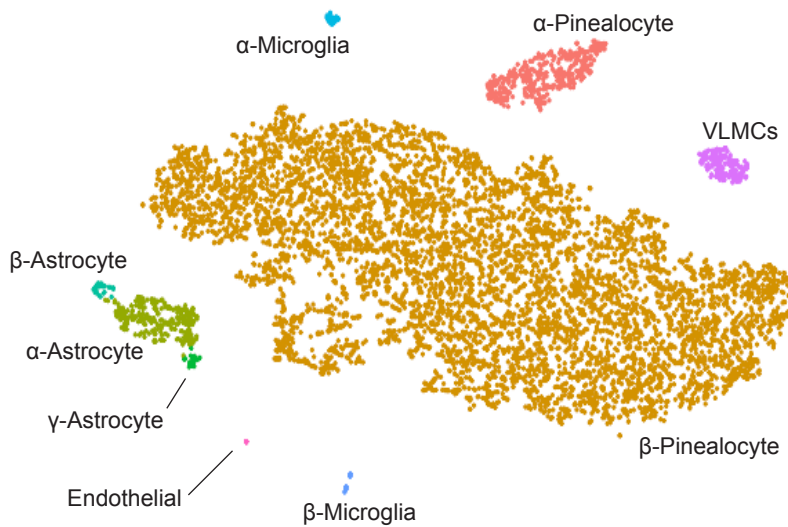

**S24 Fig. Transcriptomic characterization of nighttime pineal gland, batch effects, and QC. (A)** tSNE visualization of 7,940 nighttime rat pineal gland cells profiled by scRNA-seq. The same cell types and proportions were found as in the daytime cell samples (Figure 1). **(B-C)** tSNE visualization of daytime and nighttime cells, color coded by sample batch. The generally even distribution of sample batches indicates a lack of strong batch effects. **(D)** Violin plots showing the distribution of UMI and genes detected per cell across cell types and conditions.

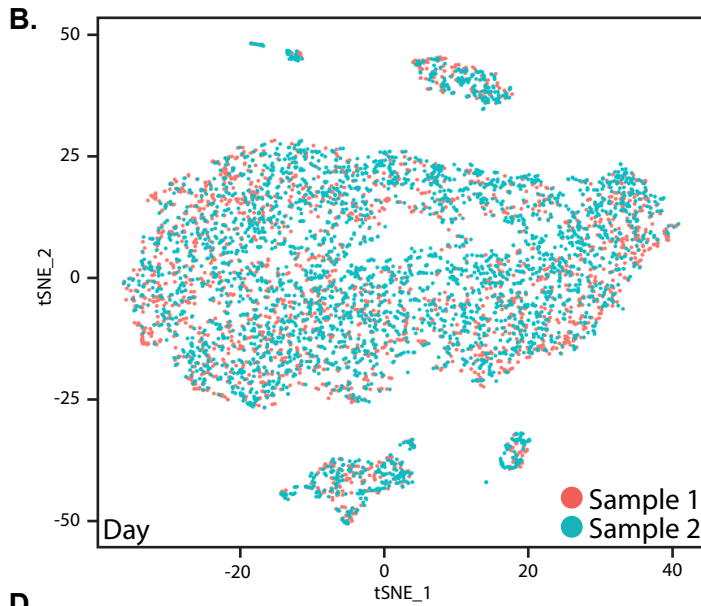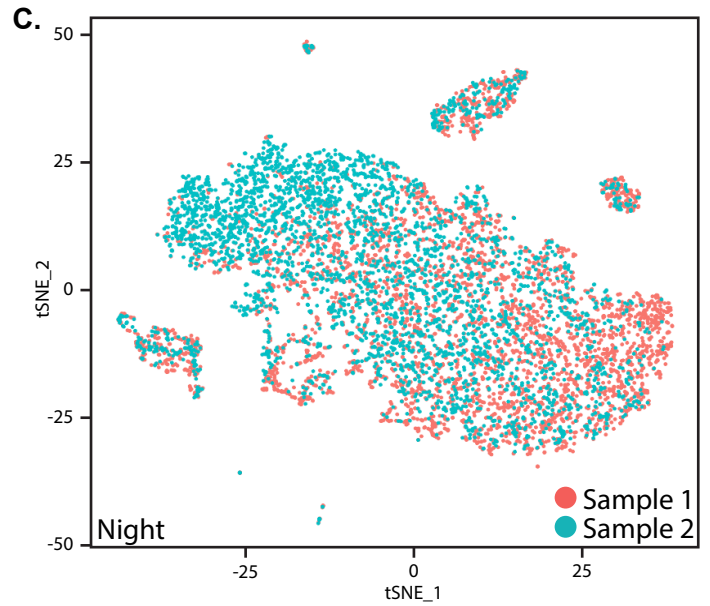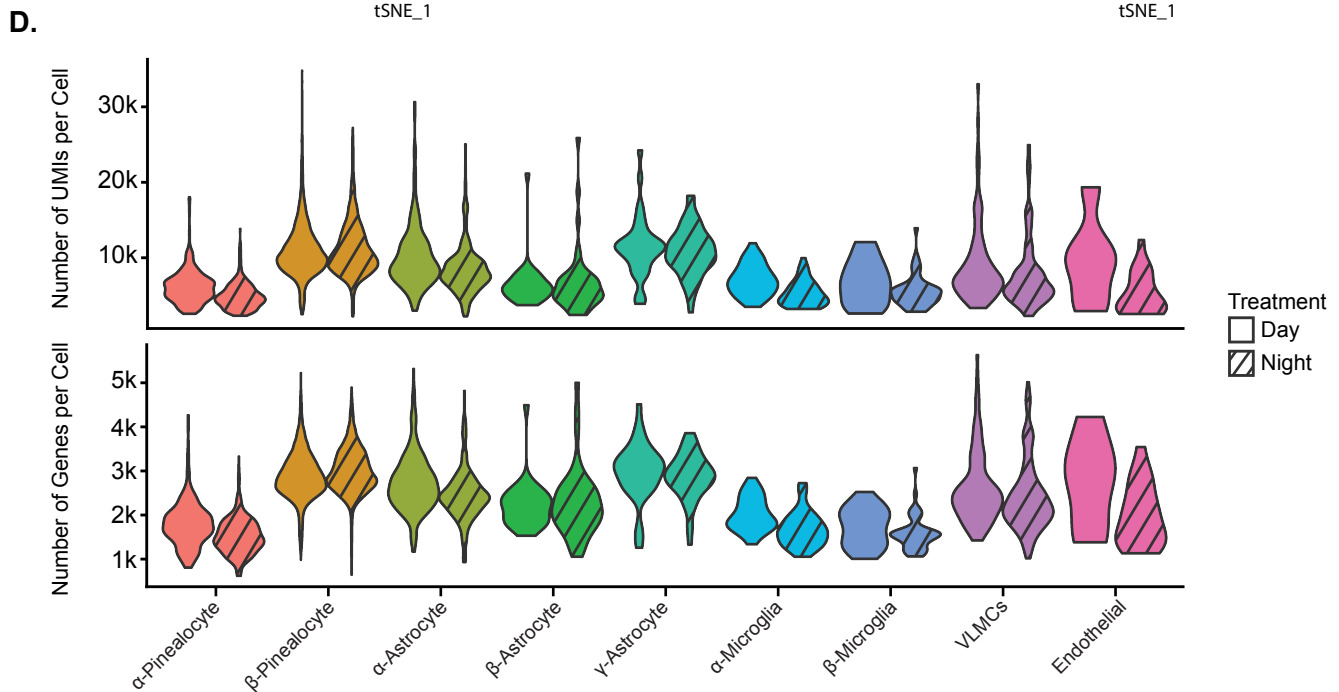

Supplement: pone.0205883.s028.pdf [file pone.0205883.s028.pdf]
