# Supplementary material for: Single-cell RNA sequencing of the mammalian pineal gland identifies two pinealocyte subtypes and cell type-specific daily patterns of gene expression
Source: PubMed Central journal article supplement (PMC6197868; doi:10.1371/journal.pone.0205883), 2018-10-22
Supplement: pone.0205883.s030.pdf [file pone.0205883.s030.pdf]

**S2 Table.** Number of single cells profiled by cell type, isoproterenol experiment

| <b>Cell Type</b>      | <b>Vehicle</b> | <b>Isoproterenol</b> |
|-----------------------|----------------|----------------------|
| $\alpha$ -Pinealocyte | 121            | 98                   |
| $\beta$ -Pinealocyte  | 1320           | 1726                 |
| Astrocyte             | 102            | 118                  |
| Microglia             | 7              | 10                   |
| VLMCs                 | 21             | 30                   |
| Endothelial           | 5              | 14                   |
| <b>Total</b>          | <b>1576</b>    | <b>1996</b>          |
